# Supplementary material for: Pericytes as mediators of infiltration of macrophages in multiple sclerosis
Source: PubMed Central journal article supplement (PMC8705458; doi:10.1186/s12974-021-02358-x), 2021-12-24

Fig S1

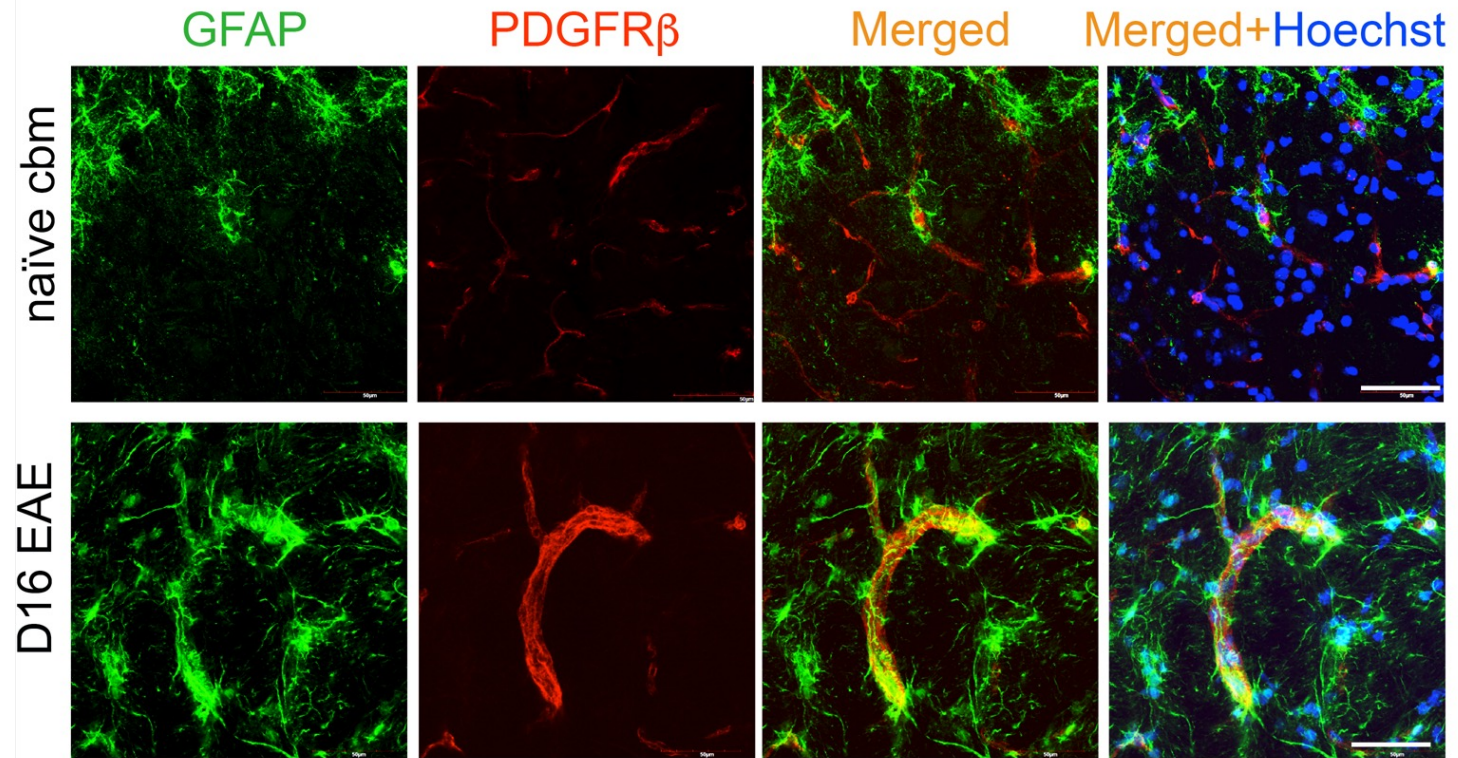

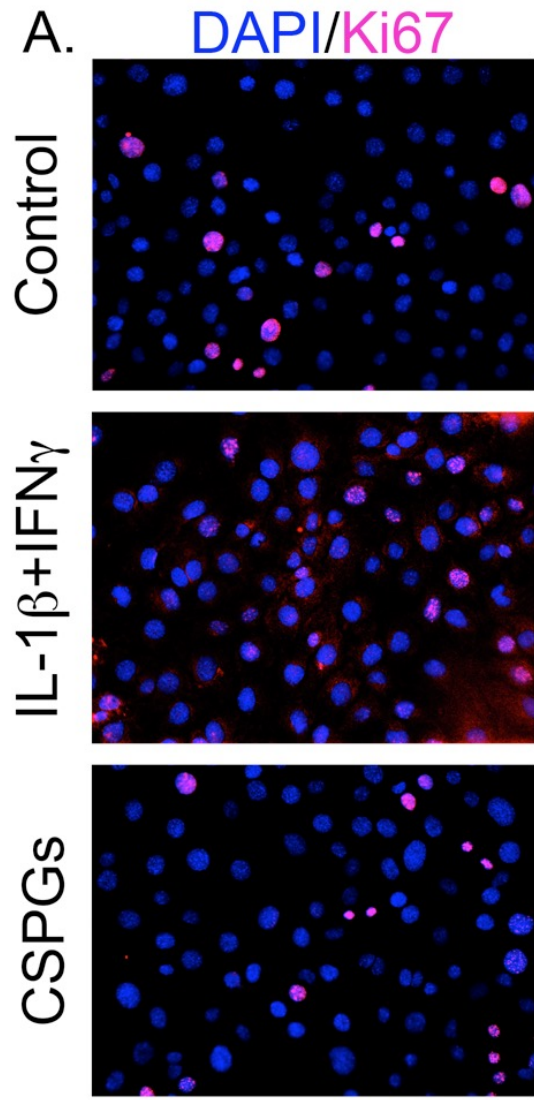

Fig S2

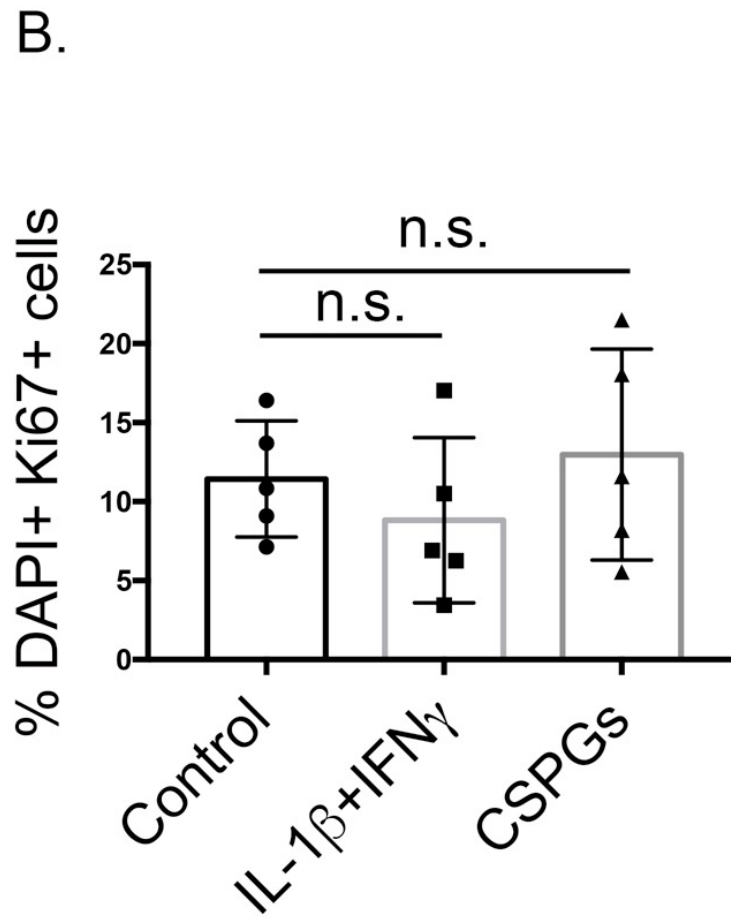

Fig S3

PDGFR $\beta$ /NG2/DAPI

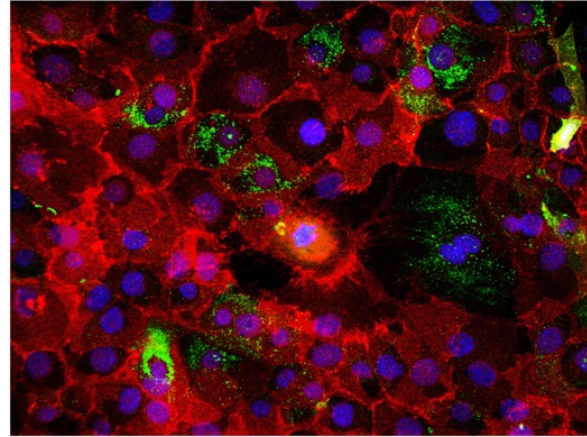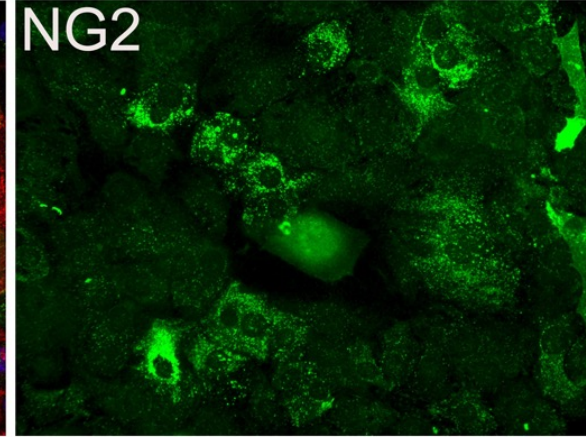

PDGFR $\beta$

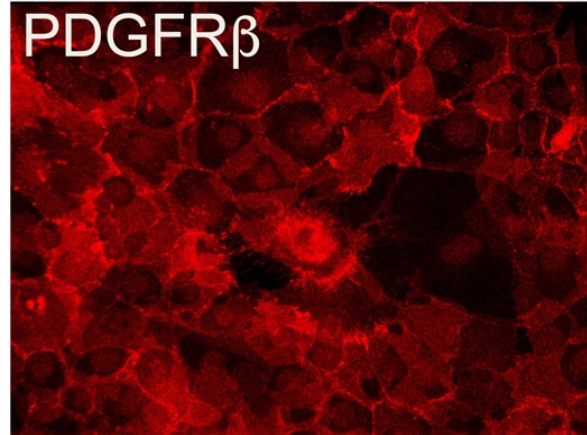

DAPI

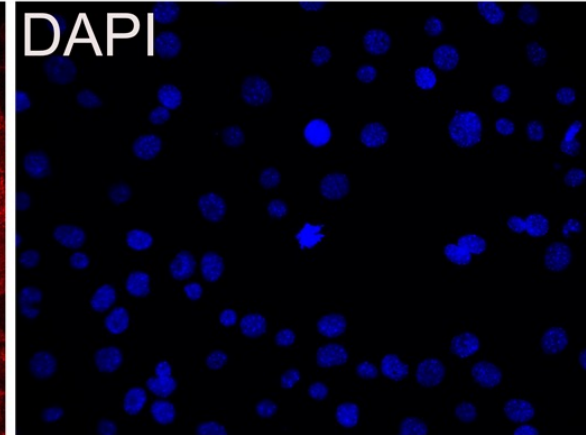

Mouse capillary pericytes in culture, P6

Fig S4

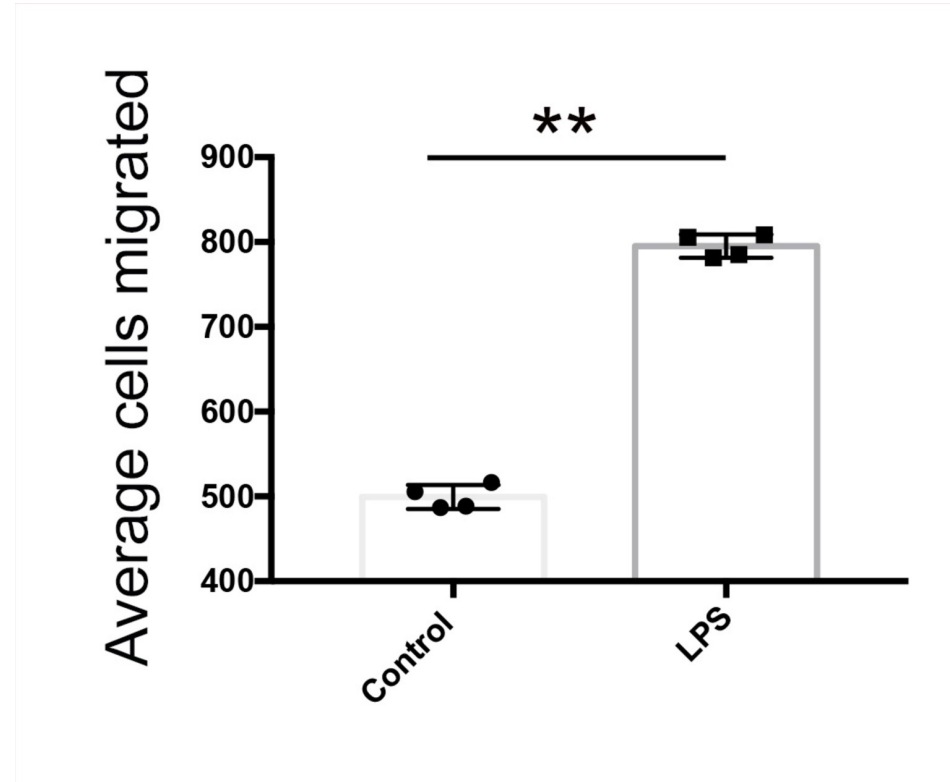

Supplement: 12974_2021_2358_MOESM1_ESM.pdf [file 12974_2021_2358_MOESM1_ESM.pdf]
